# Supplementary material
Source: publisher figshare collection journal article supplement (https://acs.figshare.com/ndownloader/files/5123608)
Supplement: Supplementary file 1 [file 5123608]

 data_global
# 1. SUBMISSION DETAILS

_publ_contact_autor
;
        A. Monge
        Instituto de Ciencia de Materiales
        CSIC
        Campus de Cantoblanco
        28049 MADRID
        Spain
;
_publ_contact_author_phone        '34 1 334-9025'
_publ_contact_author_fax          '34 1 372-0623'
_publ_contact_author_email        amonge@icmm.csic.es
_publ_requested_journal           'Chem. Mater.
_publ_requested_coeditor_name ?
_publ_contact_letter ?

#==============================================================================

# 3. TITLE AND AUTHOR LIST

_publ_section_title
;
Novel 2D and 3D Indium Metal-Organic Frameworks: Topology and Catalytic properties
;

loop_
 _publ_author_name
 _publ_author_address
     'Angeles Monge'
;
       Instituto de Ciencia de Materiales
        CSIC
        Campus de Cantoblanco
        28049 MADRID
        Spain
;
     'Natalia Snejko'
;
       Instituto de Ciencia de Materiales
        CSIC
        Campus de Cantoblanco
        28049 MADRID
        Spain
;
     'Enrique Gutierrez-Puebla'
;
       Instituto de Ciencia de Materiales
        CSIC
        Campus de Cantoblanco
        28049 MADRID
        Spain
;

     'Caridad Ruiz-Valero'
;
       Instituto de Ciencia de Materiales
        CSIC
        Campus de Cantoblanco
        28049 MADRID
        Spain
;
     'Marta Iglesias'
;
       Instituto de Ciencia de Materiales
        CSIC
        Campus de Cantoblanco
        28049 MADRID
        Spain
;
     'Berta Gomez-Lor'
;
       Instituto de Ciencia de Materiales
        CSIC
        Campus de Cantoblanco
        28049 MADRID
        Spain
;

#==============================================================================

  
data_in1
  
_audit_creation_method            SHELXL-97 
_chemical_name_systematic 
; 
 ? 
; 
_chemical_name_common             ? 
_chemical_melting_point           ? 
_chemical_formula_moiety          'C22 H14 In N2 O6' 
_chemical_formula_sum 
 'C22 H14 In N2 O6' 
_chemical_formula_weight          517.17 
  
loop_ 
 _atom_type_symbol 
 _atom_type_description 
 _atom_type_scat_dispersion_real 
 _atom_type_scat_dispersion_imag 
 _atom_type_scat_source 
 'C'  'C'   0.0033   0.0016 
 'International Tables Vol C Tables 4.2.6.8 and 6.1.1.4' 
 'H'  'H'   0.0000   0.0000 
 'International Tables Vol C Tables 4.2.6.8 and 6.1.1.4' 
 'N'  'N'   0.0061   0.0033 
 'International Tables Vol C Tables 4.2.6.8 and 6.1.1.4' 
 'O'  'O'   0.0106   0.0060 
 'International Tables Vol C Tables 4.2.6.8 and 6.1.1.4' 
 'In'  'In'  -0.7276   1.3100 
 'International Tables Vol C Tables 4.2.6.8 and 6.1.1.4' 
  
_symmetry_cell_setting            Orthorhombic 
_symmetry_space_group_name_H-M    Pbca 
  
loop_ 
 _symmetry_equiv_pos_as_xyz 
 'x, y, z' 
 '-x+1/2, -y, z+1/2' 
 '-x, y+1/2, -z+1/2' 
 'x+1/2, -y+1/2, -z' 
 '-x, -y, -z' 
 'x-1/2, y, -z-1/2' 
 'x, -y-1/2, z-1/2' 
 '-x-1/2, y-1/2, z' 
  
_cell_length_a                    13.4904(17) 
_cell_length_b                    16.202(2) 
_cell_length_c                    17.065(2) 
_cell_angle_alpha                 90.00 
_cell_angle_beta                  90.00 
_cell_angle_gamma                 90.00 
_cell_volume                      3729.9(8) 
_cell_formula_units_Z             8 
_cell_measurement_temperature     296(2) 
_cell_measurement_reflns_used     ? 
_cell_measurement_theta_min       1.0
_cell_measurement_theta_max       32.0 
  
_exptl_crystal_description        rombic 
_exptl_crystal_colour             colourless 
_exptl_crystal_size_max           0.30 
_exptl_crystal_size_mid           0.25 
_exptl_crystal_size_min           0.20 
_exptl_crystal_density_meas       ? 
_exptl_crystal_density_diffrn     1.842 
_exptl_crystal_density_method     'not measured' 
_exptl_crystal_F_000              2056 
_exptl_absorpt_coefficient_mu     1.314 
_exptl_absorpt_correction_type    none 
_exptl_absorpt_correction_T_min   ? 
_exptl_absorpt_correction_T_max   ? 
_exptl_absorpt_process_details    ? 
  
_exptl_special_details 
; 
 ? 
; 
  
_diffrn_ambient_temperature       296(2) 
_diffrn_radiation_wavelength      0.71073 
_diffrn_radiation_type            MoK\a 
_diffrn_radiation_source          'fine-focus sealed tube' 
_diffrn_radiation_monochromator   graphite 
_diffrn_measurement_device_type   ? 
_diffrn_measurement_method        '\w scans' 
_diffrn_detector_area_resol_mean  ? 
_diffrn_standards_number          ? 
_diffrn_standards_interval_count  ? 
_diffrn_standards_interval_time   ? 
_diffrn_standards_decay_%         ? 
_diffrn_reflns_number             22851 
_diffrn_reflns_av_R_equivalents   0.1088 
_diffrn_reflns_av_sigmaI/netI     0.1605 
_diffrn_reflns_limit_h_min        -18 
_diffrn_reflns_limit_h_max        19 
_diffrn_reflns_limit_k_min        -23 
_diffrn_reflns_limit_k_max        23 
_diffrn_reflns_limit_l_min        -24 
_diffrn_reflns_limit_l_max        14 
_diffrn_reflns_theta_min          3.78 
_diffrn_reflns_theta_max          31.36 
_reflns_number_total              5617 
_reflns_number_gt                 2900 
_reflns_threshold_expression      >2sigma(I) 
  
_computing_data_collection        'Siemens SMART' 
_computing_cell_refinement        'Siemens SMART' 
_computing_data_reduction         'Siemens SHELXTL' 
_computing_structure_solution     'SHELXS-97 (Sheldrick, 1990)' 
_computing_structure_refinement   'SHELXL-97 (Sheldrick, 1997)' 
_computing_molecular_graphics     'Siemens SHELXTL' 
_computing_publication_material   'Siemens SHELXTL' 
  
_refine_special_details 
; 
 Refinement of F^2^ against ALL reflections.  The weighted R-factor wR and 
 goodness of fit S are based on F^2^, conventional R-factors R are based 
 on F, with F set to zero for negative F^2^. The threshold expression of 
 F^2^ > 2sigma(F^2^) is used only for calculating R-factors(gt) etc. and is 
 not relevant to the choice of reflections for refinement.  R-factors based 
 on F^2^ are statistically about twice as large as those based on F, and R- 
 factors based on ALL data will be even larger. 
; 
  
_refine_ls_structure_factor_coef  Fsqd 
_refine_ls_matrix_type            full 
_refine_ls_weighting_scheme       calc 
_refine_ls_weighting_details 
 'calc w=1/[\s^2^(Fo^2^)+(0.0245P)^2^+0.0000P] where P=(Fo^2^+2Fc^2^)/3' 
_atom_sites_solution_primary      direct 
_atom_sites_solution_secondary    difmap 
_atom_sites_solution_hydrogens    geom 
_refine_ls_hydrogen_treatment     mixed 
_refine_ls_extinction_method      none 
_refine_ls_extinction_coef        ? 
_refine_ls_number_reflns          5617 
_refine_ls_number_parameters      336 
_refine_ls_number_restraints      0 
_refine_ls_R_factor_all           0.1541 
_refine_ls_R_factor_gt            0.0459 
_refine_ls_wR_factor_ref          0.0866 
_refine_ls_wR_factor_gt           0.0703 
_refine_ls_goodness_of_fit_ref    0.892 
_refine_ls_restrained_S_all       0.892 
_refine_ls_shift/su_max           0.043 
_refine_ls_shift/su_mean          0.002 
  
loop_ 
 _atom_site_label 
 _atom_site_type_symbol 
 _atom_site_fract_x 
 _atom_site_fract_y 
 _atom_site_fract_z 
 _atom_site_U_iso_or_equiv 
 _atom_site_adp_type 
 _atom_site_occupancy 
 _atom_site_symmetry_multiplicity 
 _atom_site_calc_flag 
 _atom_site_refinement_flags 
 _atom_site_disorder_assembly 
 _atom_site_disorder_group 
In1 In 0.64373(2) 0.156605(16) 0.441163(17) 0.02044(8) Uani 1 1 d . . . 
O1 O 0.6711(3) 0.0736(2) 0.3160(2) 0.0491(10) Uani 1 1 d . . . 
O2 O 0.5313(2) 0.0845(2) 0.3772(2) 0.0422(9) Uani 1 1 d . . . 
O3 O 0.6565(2) 0.2643(2) 0.36121(19) 0.0380(8) Uani 1 1 d . . . 
O4 O 0.5205(2) 0.26715(19) 0.42835(19) 0.0405(9) Uani 1 1 d . . . 
O5 O 0.7323(2) 0.04930(17) 0.49153(18) 0.0280(7) Uani 1 1 d . . . 
O6 O 0.8122(2) 0.14323(17) 0.42383(17) 0.0273(7) Uani 1 1 d . . . 
N1 N 0.5295(2) 0.14119(19) 0.54397(19) 0.0226(8) Uani 1 1 d . . . 
N2 N 0.6967(2) 0.23275(19) 0.5465(2) 0.0222(8) Uani 1 1 d . . . 
C1 C 0.5815(4) 0.0558(3) 0.3224(3) 0.0323(11) Uani 1 1 d . . . 
C2 C 0.5363(3) -0.0043(2) 0.2652(3) 0.0248(10) Uani 1 1 d . . . 
C3 C 0.4383(4) -0.0271(3) 0.2709(3) 0.0350(12) Uani 1 1 d . . . 
C4 C 0.5969(4) -0.0417(3) 0.2103(3) 0.0298(11) Uani 1 1 d . . . 
C5 C 0.5742(3) 0.2969(3) 0.3766(3) 0.0255(10) Uani 1 1 d . . . 
C6 C 0.5398(3) 0.3702(3) 0.3292(3) 0.0257(10) Uani 1 1 d . . . 
C7 C 0.5988(4) 0.4102(3) 0.2763(3) 0.0357(13) Uani 1 1 d . . . 
C8 C 0.4406(4) 0.3954(3) 0.3363(3) 0.0280(11) Uani 1 1 d . . . 
C9 C 0.8129(3) 0.0785(3) 0.4635(2) 0.0242(10) Uani 1 1 d . . . 
C10 C 0.9095(3) 0.0350(3) 0.4808(2) 0.0232(10) Uani 1 1 d . . . 
C11 C 0.9122(3) -0.0371(3) 0.5230(3) 0.0274(10) Uani 1 1 d . . . 
C12 C 1.0035(3) -0.0728(3) 0.5417(3) 0.0279(11) Uani 1 1 d . . . 
C13 C 0.4448(3) 0.0991(3) 0.5389(3) 0.0266(11) Uani 1 1 d . . . 
C14 C 0.3661(4) 0.1116(3) 0.5881(3) 0.0323(11) Uani 1 1 d . . . 
C15 C 0.3731(3) 0.1715(3) 0.6446(3) 0.0350(12) Uani 1 1 d . . . 
C16 C 0.4603(4) 0.2144(3) 0.6523(3) 0.0318(12) Uani 1 1 d . . . 
C17 C 0.5375(3) 0.1983(3) 0.6014(3) 0.0233(10) Uani 1 1 d . . . 
C18 C 0.6339(3) 0.2405(2) 0.6085(2) 0.0236(9) Uani 1 1 d . . . 
C19 C 0.6614(4) 0.2846(3) 0.6744(3) 0.0358(13) Uani 1 1 d . . . 
C20 C 0.7530(4) 0.3203(3) 0.6784(3) 0.0404(14) Uani 1 1 d . . . 
C21 C 0.8167(4) 0.3123(3) 0.6158(3) 0.0354(13) Uani 1 1 d . . . 
C22 C 0.7854(3) 0.2671(3) 0.5519(3) 0.0306(11) Uani 1 1 d . . . 
H22 H 0.823(2) 0.259(2) 0.515(2) 0.000(9) Uiso 1 1 d . . . 
H12 H 1.003(2) -0.118(2) 0.5733(19) 0.001(9) Uiso 1 1 d . . . 
H20 H 0.773(4) 0.348(3) 0.717(3) 0.060(18) Uiso 1 1 d . . . 
H11 H 0.848(3) -0.064(2) 0.543(2) 0.027(11) Uiso 1 1 d . . . 
H21 H 0.880(3) 0.330(3) 0.623(3) 0.048(16) Uiso 1 1 d . . . 
H13 H 0.438(3) 0.063(2) 0.498(2) 0.020(11) Uiso 1 1 d . . . 
H3 H 0.398(3) 0.002(3) 0.302(2) 0.029(13) Uiso 1 1 d . . . 
H4 H 0.657(3) -0.023(3) 0.201(2) 0.026(13) Uiso 1 1 d . . . 
H7 H 0.664(3) 0.395(3) 0.273(3) 0.032(14) Uiso 1 1 d . . . 
H8 H 0.398(4) 0.375(3) 0.370(3) 0.054(17) Uiso 1 1 d . . . 
H16 H 0.461(3) 0.255(3) 0.687(2) 0.030(13) Uiso 1 1 d . . . 
H15 H 0.322(3) 0.187(3) 0.684(3) 0.043(14) Uiso 1 1 d . . . 
H19 H 0.623(3) 0.284(3) 0.706(3) 0.028(15) Uiso 1 1 d . . . 
H14 H 0.307(3) 0.082(3) 0.582(2) 0.032(13) Uiso 1 1 d . . . 
  
loop_ 
 _atom_site_aniso_label 
 _atom_site_aniso_U_11 
 _atom_site_aniso_U_22 
 _atom_site_aniso_U_33 
 _atom_site_aniso_U_23 
 _atom_site_aniso_U_13 
 _atom_site_aniso_U_12 
In1 0.02235(13) 0.01711(13) 0.02186(14) 0.00049(15) -0.00361(16) 0.00107(14) 
O1 0.056(3) 0.053(2) 0.038(2) -0.0075(17) -0.0022(18) -0.0279(18) 
O2 0.041(2) 0.040(2) 0.045(2) -0.0231(18) -0.0084(18) 0.0080(16) 
O3 0.036(2) 0.038(2) 0.040(2) 0.0094(15) -0.0048(17) 0.0080(16) 
O4 0.045(2) 0.035(2) 0.041(2) 0.0157(17) -0.0031(18) 0.0023(15) 
O5 0.0220(16) 0.0248(17) 0.037(2) 0.0032(14) -0.0034(15) 0.0032(13) 
O6 0.0264(14) 0.0231(18) 0.0324(19) 0.0043(13) -0.0051(13) 0.0045(12) 
N1 0.0248(18) 0.019(2) 0.024(2) 0.0028(14) -0.0044(15) -0.0010(13) 
N2 0.0239(18) 0.0177(18) 0.025(2) 0.0023(15) -0.0026(17) -0.0024(14) 
C1 0.043(3) 0.023(3) 0.031(3) 0.007(2) -0.013(3) 0.001(2) 
C2 0.037(3) 0.015(2) 0.023(2) -0.0015(18) -0.006(2) -0.0025(18) 
C3 0.033(3) 0.030(3) 0.042(3) -0.014(2) -0.007(3) 0.008(2) 
C4 0.031(3) 0.032(3) 0.027(3) 0.001(2) 0.000(2) -0.011(2) 
C5 0.036(3) 0.016(2) 0.025(3) -0.0019(19) -0.014(2) -0.005(2) 
C6 0.030(2) 0.023(2) 0.024(3) 0.0015(19) -0.007(2) 0.0008(18) 
C7 0.019(3) 0.033(3) 0.055(4) 0.008(2) -0.002(3) 0.003(2) 
C8 0.034(3) 0.028(3) 0.022(3) 0.001(2) 0.001(2) 0.006(2) 
C9 0.025(2) 0.027(3) 0.020(3) -0.0076(19) -0.0063(19) 0.0019(19) 
C10 0.024(2) 0.022(2) 0.024(2) -0.0015(19) -0.008(2) 0.0041(18) 
C11 0.023(3) 0.024(2) 0.036(3) 0.002(2) 0.000(2) -0.0014(19) 
C12 0.032(3) 0.026(3) 0.025(3) 0.008(2) -0.001(2) 0.003(2) 
C13 0.029(3) 0.019(2) 0.032(3) 0.003(2) -0.006(2) -0.0026(18) 
C14 0.028(3) 0.029(3) 0.040(3) 0.010(2) -0.005(2) -0.007(2) 
C15 0.027(3) 0.041(3) 0.036(3) 0.010(2) 0.006(2) 0.004(2) 
C16 0.037(3) 0.028(3) 0.031(3) 0.001(2) 0.006(2) -0.001(2) 
C17 0.025(2) 0.019(2) 0.026(3) 0.0065(19) 0.000(2) -0.0012(18) 
C18 0.025(2) 0.022(2) 0.024(2) 0.0016(18) 0.004(2) 0.001(2) 
C19 0.033(3) 0.043(3) 0.031(3) -0.010(2) 0.012(2) -0.007(2) 
C20 0.042(3) 0.041(3) 0.038(3) -0.014(3) -0.006(3) -0.009(2) 
C21 0.025(3) 0.033(3) 0.048(4) -0.008(2) -0.004(3) -0.005(2) 
C22 0.028(2) 0.029(2) 0.034(3) -0.001(2) 0.012(3) -0.0033(19) 
  
_geom_special_details 
; 
 All esds (except the esd in the dihedral angle between two l.s. planes) 
 are estimated using the full covariance matrix.  The cell esds are taken 
 into account individually in the estimation of esds in distances, angles 
 and torsion angles; correlations between esds in cell parameters are only 
 used when they are defined by crystal symmetry.  An approximate (isotropic) 
 treatment of cell esds is used for estimating esds involving l.s. planes. 
; 
  
loop_ 
 _geom_bond_atom_site_label_1 
 _geom_bond_atom_site_label_2 
 _geom_bond_distance 
 _geom_bond_site_symmetry_2 
 _geom_bond_publ_flag 
In1 O2 2.204(3) . ? 
In1 O3 2.221(3) . ? 
In1 O5 2.278(3) . ? 
In1 N2 2.295(3) . ? 
In1 O6 2.303(3) . ? 
In1 N1 2.348(3) . ? 
In1 O4 2.453(3) . ? 
In1 O1 2.552(4) . ? 
In1 C9 2.637(4) . ? 
In1 C5 2.694(4) . ? 
O1 C1 1.247(5) . ? 
O2 C1 1.244(5) . ? 
O3 C5 1.257(5) . ? 
O4 C5 1.239(5) . ? 
O5 C9 1.279(5) . ? 
O6 C9 1.248(5) . ? 
N1 C13 1.334(5) . ? 
N1 C17 1.352(5) . ? 
N2 C22 1.324(5) . ? 
N2 C18 1.360(5) . ? 
C1 C2 1.508(6) . ? 
C2 C3 1.377(6) . ? 
C2 C4 1.382(6) . ? 
C3 C7 1.390(6) 3_645 ? 
C4 C8 1.388(6) 3_645 ? 
C5 C6 1.510(6) . ? 
C6 C7 1.366(6) . ? 
C6 C8 1.405(6) . ? 
C7 C3 1.390(6) 3_655 ? 
C8 C4 1.388(6) 3_655 ? 
C9 C10 1.511(6) . ? 
C10 C11 1.373(6) . ? 
C10 C12 1.378(6) 5_756 ? 
C11 C12 1.397(6) . ? 
C12 C10 1.378(6) 5_756 ? 
C13 C14 1.369(6) . ? 
C14 C15 1.373(7) . ? 
C15 C16 1.373(6) . ? 
C16 C17 1.381(6) . ? 
C17 C18 1.475(6) . ? 
C18 C19 1.383(6) . ? 
C19 C20 1.367(7) . ? 
C20 C21 1.378(7) . ? 
C21 C22 1.378(7) . ? 
  
loop_ 
 _geom_angle_atom_site_label_1 
 _geom_angle_atom_site_label_2 
 _geom_angle_atom_site_label_3 
 _geom_angle 
 _geom_angle_site_symmetry_1 
 _geom_angle_site_symmetry_3 
 _geom_angle_publ_flag 
O2 In1 O3 99.51(13) . . ? 
O2 In1 O5 98.25(11) . . ? 
O3 In1 O5 142.23(11) . . ? 
O2 In1 N2 152.56(13) . . ? 
O3 In1 N2 92.01(12) . . ? 
O5 In1 N2 87.21(11) . . ? 
O2 In1 O6 124.46(11) . . ? 
O3 In1 O6 85.33(11) . . ? 
O5 In1 O6 57.22(10) . . ? 
N2 In1 O6 81.02(11) . . ? 
O2 In1 N1 82.09(12) . . ? 
O3 In1 N1 126.38(11) . . ? 
O5 In1 N1 88.93(11) . . ? 
N2 In1 N1 71.09(12) . . ? 
O6 In1 N1 137.20(11) . . ? 
O2 In1 O4 82.92(11) . . ? 
O3 In1 O4 54.85(11) . . ? 
O5 In1 O4 161.14(11) . . ? 
N2 In1 O4 83.58(11) . . ? 
O6 In1 O4 136.56(10) . . ? 
N1 In1 O4 72.53(11) . . ? 
O2 In1 O1 53.50(11) . . ? 
O3 In1 O1 83.61(12) . . ? 
O5 In1 O1 80.64(11) . . ? 
N2 In1 O1 153.45(11) . . ? 
O6 In1 O1 72.54(10) . . ? 
N1 In1 O1 131.64(11) . . ? 
O4 In1 O1 114.11(11) . . ? 
O2 In1 C9 114.38(12) . . ? 
O3 In1 C9 113.49(13) . . ? 
O5 In1 C9 28.99(11) . . ? 
N2 In1 C9 82.84(12) . . ? 
O6 In1 C9 28.24(11) . . ? 
N1 In1 C9 114.13(13) . . ? 
O4 In1 C9 161.70(12) . . ? 
O1 In1 C9 75.09(12) . . ? 
O2 In1 C5 90.31(12) . . ? 
O3 In1 C5 27.54(12) . . ? 
O5 In1 C5 168.71(12) . . ? 
N2 In1 C5 88.56(12) . . ? 
O6 In1 C5 111.74(13) . . ? 
N1 In1 C5 99.60(13) . . ? 
O4 In1 C5 27.35(11) . . ? 
O1 In1 C5 98.82(13) . . ? 
C9 In1 C5 139.90(15) . . ? 
C1 O1 In1 84.7(3) . . ? 
C1 O2 In1 101.3(3) . . ? 
C5 O3 In1 97.7(3) . . ? 
C5 O4 In1 87.2(3) . . ? 
C9 O5 In1 91.3(2) . . ? 
C9 O6 In1 91.0(3) . . ? 
C13 N1 C17 117.7(4) . . ? 
C13 N1 In1 124.6(3) . . ? 
C17 N1 In1 114.6(3) . . ? 
C22 N2 C18 118.0(4) . . ? 
C22 N2 In1 124.2(3) . . ? 
C18 N2 In1 117.7(3) . . ? 
O2 C1 O1 120.5(5) . . ? 
O2 C1 C2 120.5(4) . . ? 
O1 C1 C2 118.9(5) . . ? 
C3 C2 C4 120.0(4) . . ? 
C3 C2 C1 121.0(4) . . ? 
C4 C2 C1 118.8(4) . . ? 
C2 C3 C7 120.0(5) . 3_645 ? 
C2 C4 C8 119.6(4) . 3_645 ? 
O4 C5 O3 120.1(4) . . ? 
O4 C5 C6 120.5(4) . . ? 
O3 C5 C6 119.3(4) . . ? 
O4 C5 In1 65.4(2) . . ? 
O3 C5 In1 54.8(2) . . ? 
C6 C5 In1 171.6(3) . . ? 
C7 C6 C8 118.3(4) . . ? 
C7 C6 C5 123.2(4) . . ? 
C8 C6 C5 118.4(4) . . ? 
C6 C7 C3 121.4(5) . 3_655 ? 
C4 C8 C6 120.8(5) 3_655 . ? 
O6 C9 O5 120.5(4) . . ? 
O6 C9 C10 120.3(4) . . ? 
O5 C9 C10 119.2(4) . . ? 
O6 C9 In1 60.8(2) . . ? 
O5 C9 In1 59.7(2) . . ? 
C10 C9 In1 177.0(3) . . ? 
C11 C10 C12 120.1(4) . 5_756 ? 
C11 C10 C9 121.5(4) . . ? 
C12 C10 C9 118.2(4) 5_756 . ? 
C10 C11 C12 119.6(4) . . ? 
C10 C12 C11 120.2(4) 5_756 . ? 
N1 C13 C14 123.3(5) . . ? 
C13 C14 C15 118.8(5) . . ? 
C16 C15 C14 119.0(5) . . ? 
C15 C16 C17 119.3(5) . . ? 
N1 C17 C16 121.7(4) . . ? 
N1 C17 C18 116.5(4) . . ? 
C16 C17 C18 121.7(4) . . ? 
N2 C18 C19 120.9(4) . . ? 
N2 C18 C17 116.3(4) . . ? 
C19 C18 C17 122.8(4) . . ? 
C20 C19 C18 120.1(5) . . ? 
C19 C20 C21 119.0(5) . . ? 
C22 C21 C20 118.2(5) . . ? 
N2 C22 C21 123.7(5) . . ? 
  
_diffrn_measured_fraction_theta_max    0.916 
_diffrn_reflns_theta_full              31.36 
_diffrn_measured_fraction_theta_full   0.916 
_refine_diff_density_max    0.622 
_refine_diff_density_min   -1.194 
_refine_diff_density_rms    0.124 
